# Supplementary material for: The cryo-EM structure of the acid activatable pore-forming immune effector Macrophage-expressed gene 1
Source: PubMed Central journal article supplement (PMC6753088; doi:10.1038/s41467-019-12279-2), 2019-09-19
Supplement: 41467_2019_12279_MOESM1_ESM.pdf [file 41467_2019_12279_MOESM1_ESM.pdf]

**The structure of Macrophage-Expressed Gene 1 a phagolysosome immune effector that  
is activated upon acidification**

**Pang, Bayly-Jones *et al.***

## SUPPLEMENTARY INFORMATION

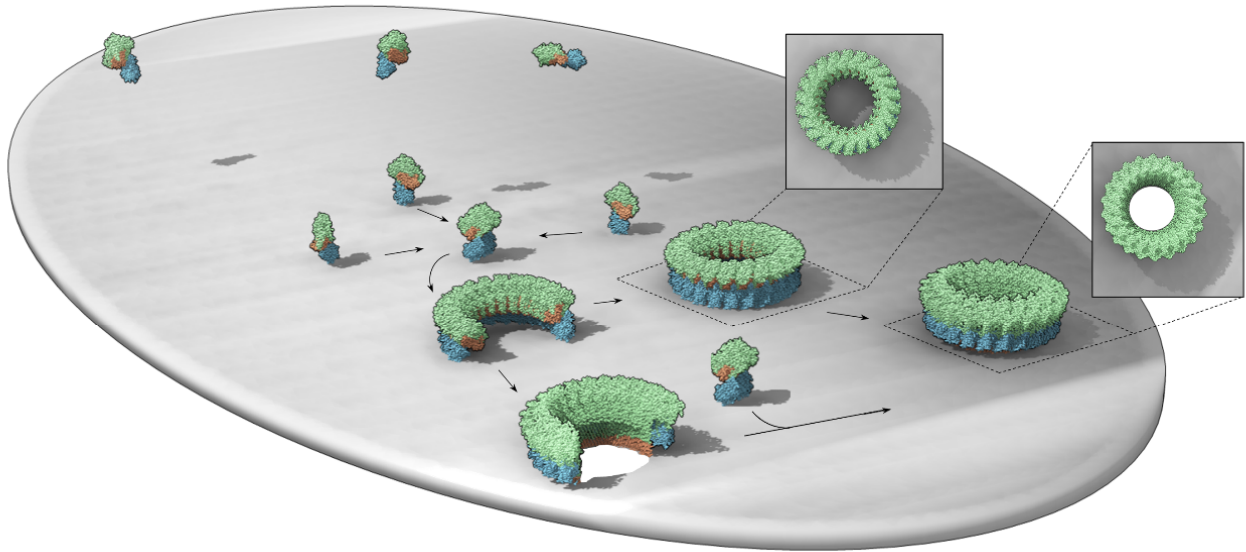

**Supplementary Figure 1. Simple illustration of the canonical CDC mechanism of pore formation.** Initially freely diffusing soluble subunits recognise and bind to target membranes by employing a target recognition domain. Membrane bound monomers undergo two-dimensional diffusion along the surface of the membrane assembling into larger oligomers that have yet to insert into the membrane i.e. prepores or arcs. These prepores (complete or incomplete) can then undergo a conformation change whereby the TMH regions unfurl and insert into the membrane forming a giant (complete or incomplete)  $\beta$ -barrel pore. MACPFs (e.g., MAC and perforin) have shown variations of this mechanism, with oligomerisation largely coinciding with membrane insertion<sup>1,2</sup>. Insets represent views from above.

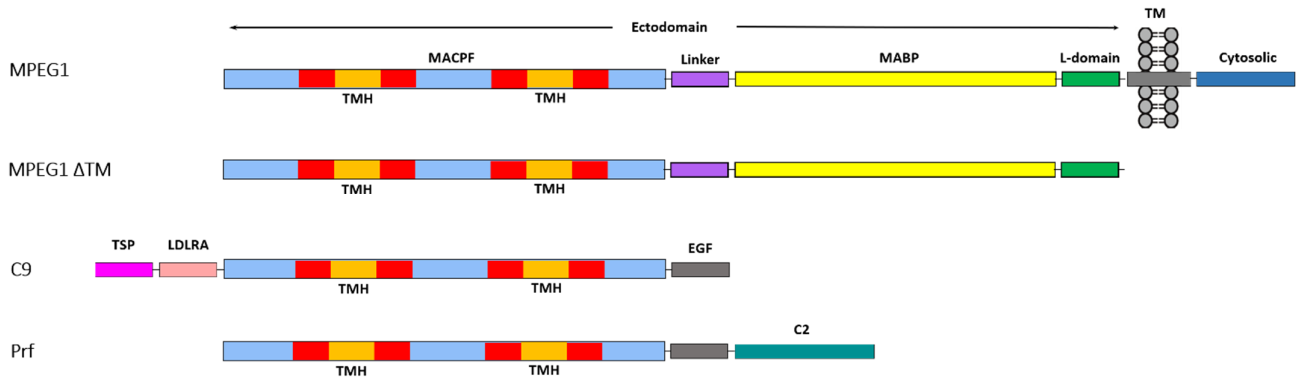

**Supplementary Figure 2. Schematic of MPEG1 domain architecture.** MPEG1, complement C9 and perforin share a homologous MACPF domain, however only MPEG1 possesses a transmembrane tether and cytosolic region (missing in our construct, depicted here as MPEG1  $\Delta$ TM). The proposed orientation of MPEG1 in the vesicular compartment places the pore forming domain in the acidic lumen of the phagosome, while the cytosolic region is exposed in the cytoplasm.

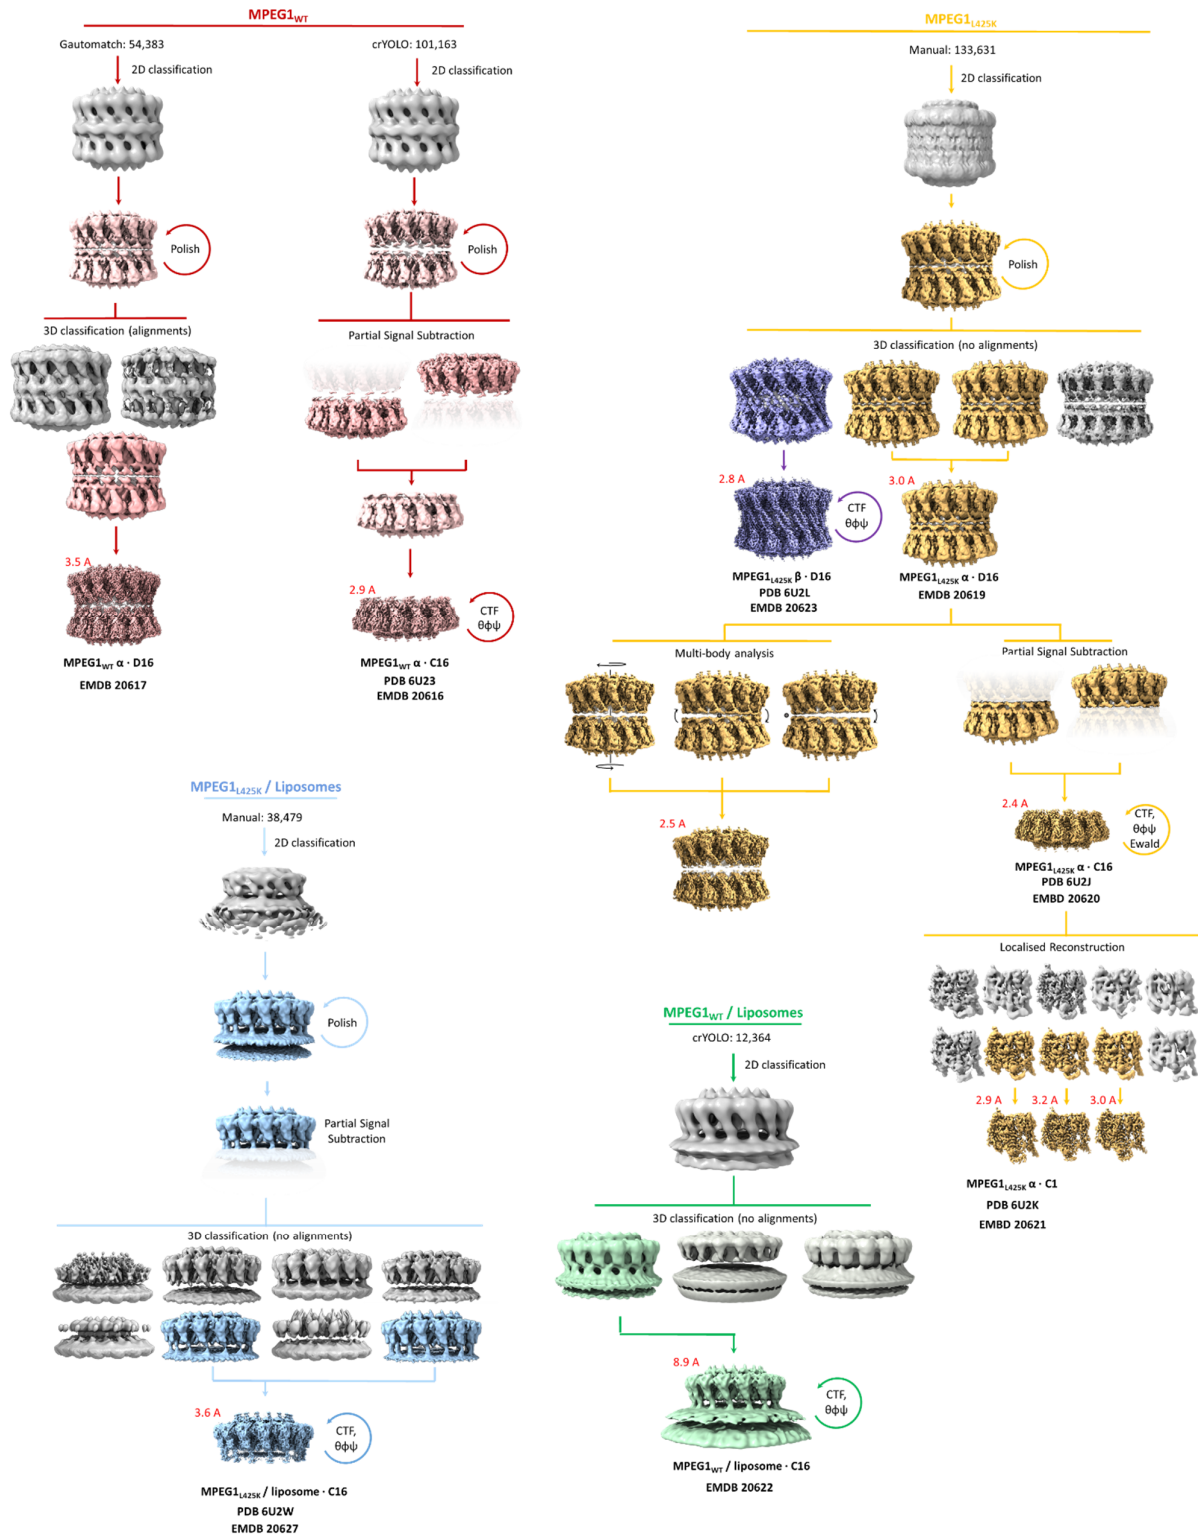

**Supplementary Figure 3. Summarised overview of the analysis and workflow for all four cryo-EM data sets.** Two data sets of the soluble head-to-head assembly were collected, namely MPEG1<sub>WT</sub> (rose) and MPEG1<sub>L425K</sub> (yellow/purple). Additionally, two data sets of the lipid-bound MPEG1 prepore assembly were obtained, referred to as MPEG1<sub>WT</sub> / liposome (green) and MPEG1<sub>L425K</sub> / liposome (blue).



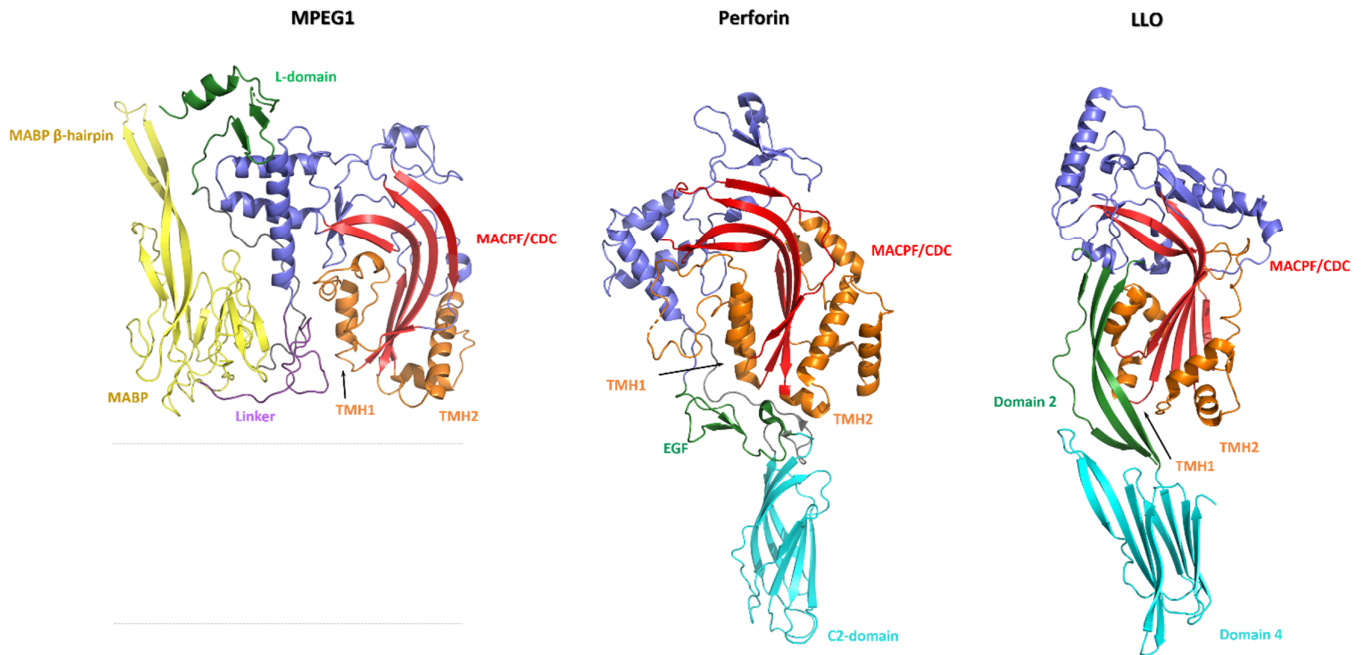

**Supplementary Figure 4. Structural comparison between MPEG1, lymphocyte perforin and lysteriolysin O (LLO).** The pore forming MACPF/CDC domain is coloured blue, with the central  $\beta$ -sheet in red and TMH1/2 in orange. Notably in these exemplars (perforin [PDB 3NSJ], LLO [PDB 4CDB]), the MACPF/CDC domain is oriented in the same direction as the ancillary membrane targeting domain, while the ancillary membrane binding domain of MPEG1 is inverted relative to the inserting direction of the MACPF domain (MPEG1; yellow. Perforin C2 domain and LLO domain 4; cyan). The shelf domain, which in CDCs facilitates collapse during pore formation, is coloured green.

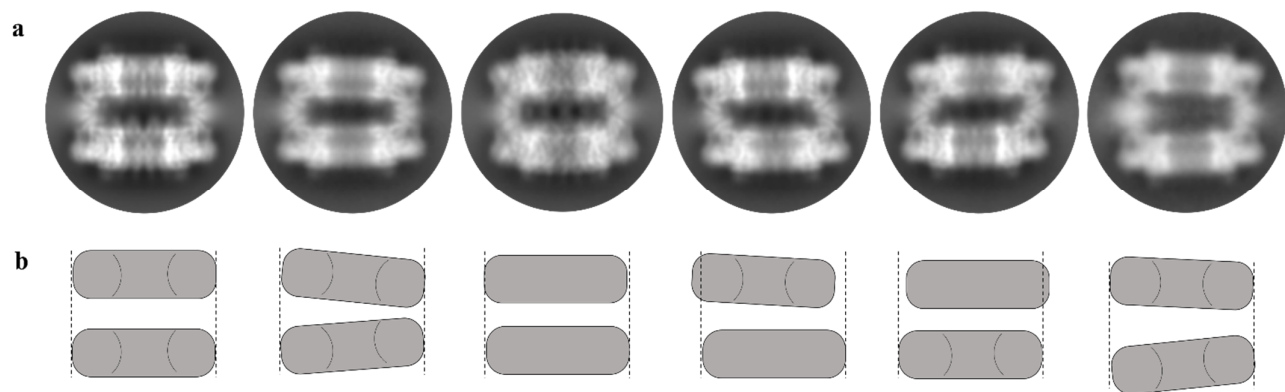

**Supplementary Figure 5. Conformational variability of wild type MPEG1 as observed by 2D class averages from cryo-electron microscopy. a)** Comparison between 2D class averages of vitrified MPEG1 WT reveals each 16-mer ring can adopt a range of positions relative to one another and hence do not adopt one single, well defined conformational state. **b)** Below each 2D class average is a simplified cartoon model to depict the variation between each class.

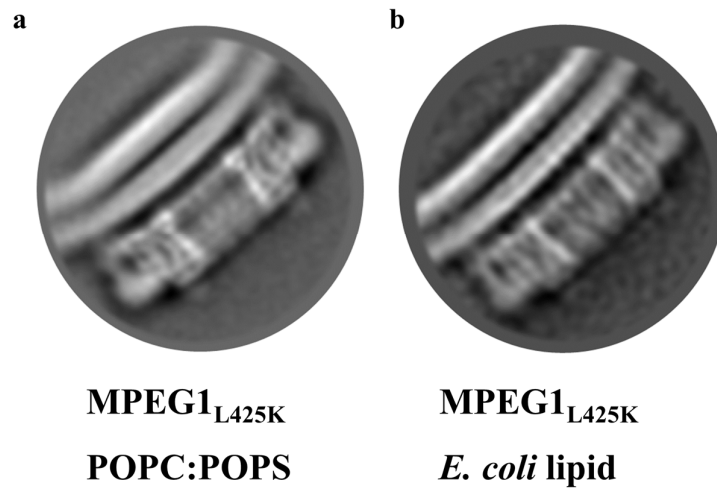

**Supplementary Figure 6. Comparison between 2D class averages of vitrified MPEG1 (L425K) bound to liposomes of two different lipid composition. a) Side view of MPEG1 bound to POPC/POPS liposomes, and b) corresponding view of MPEG1 bound to liposomes of *E. coli* total lipid extract.**

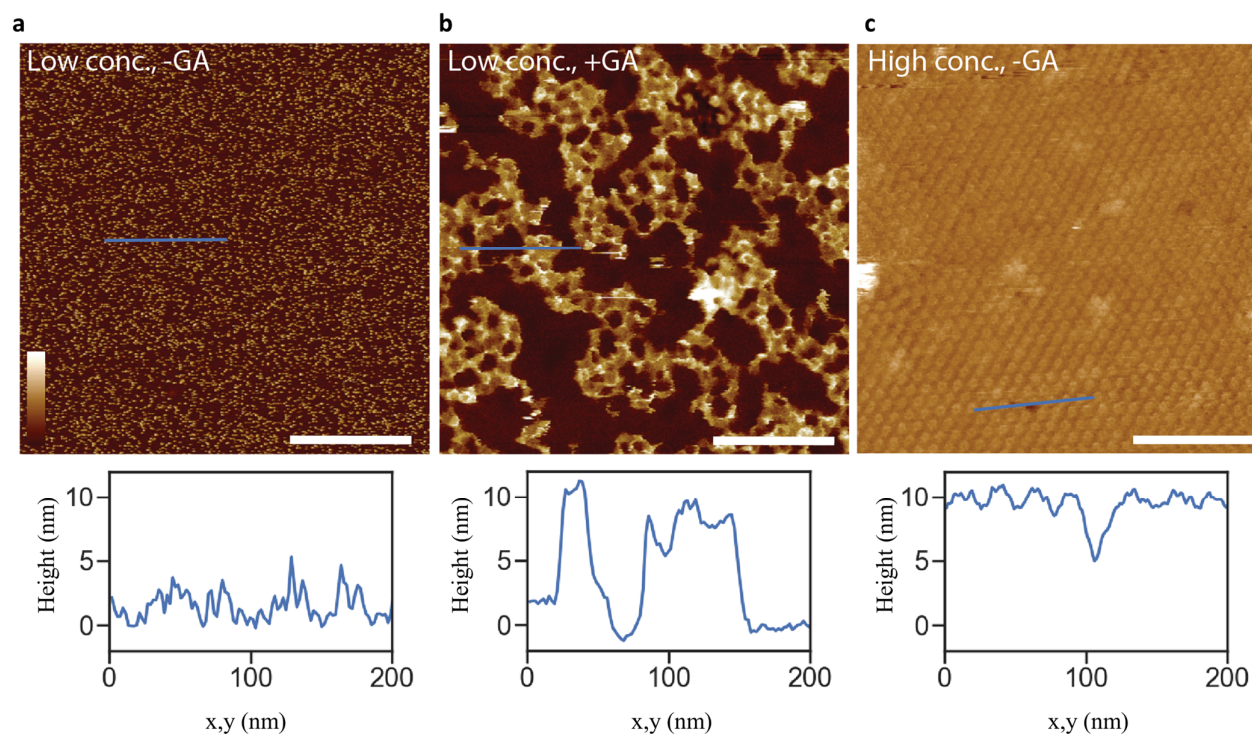

**Supplementary Figure 7. Atomic force microscopy images of MPEG1 on supported lipid bilayers consisting of POPC:POPS (1:1 % mol).** **a)** Without (-GA) and **b)** with (+GA) glutaraldehyde fixation, at neutral pH. Glutaraldehyde fixation appears to create more heterogeneous sample, perhaps due to cross-linking between MPEG1 and the membrane. **c)** Increasing the concentration of MPEG1 results in a high-density, hexagonal packing on the supported bilayer. The dynamic motion observed in **a)** is therefore reduced such that the MPEG1 assemblies can be well resolved without glutaraldehyde fixation. Shown below each AFM image are 1D height profiles extracted from selected regions (blue lines) where both membrane and MPEG1 prepores are observed. Scale bar: 200 nm. Colour (height) scale: 16 nm.

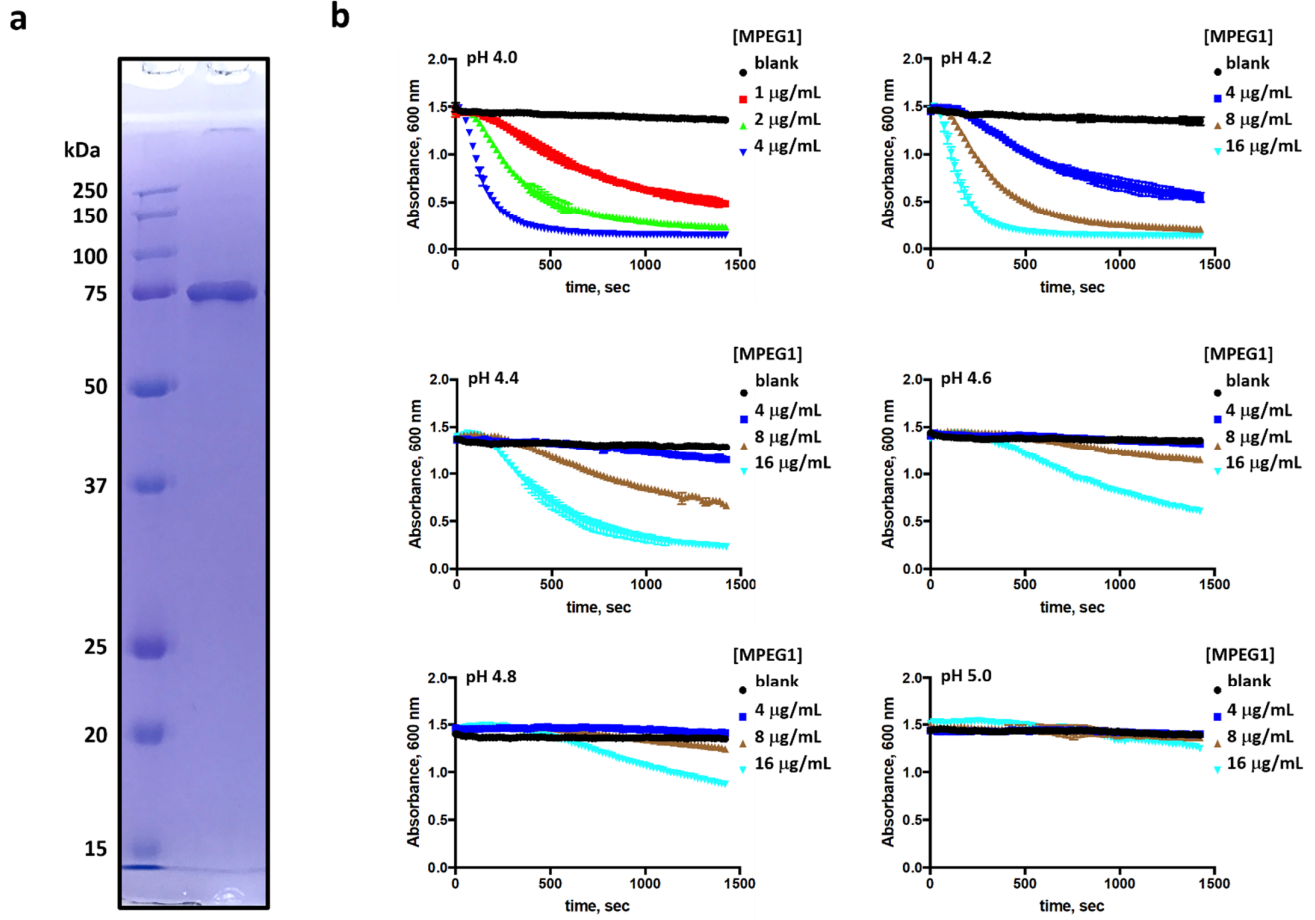

**Supplementary Figure 8. Recombinant purified MPEG1 and corresponding acid induced lytic activity.** **a)** 15% (v/v) SDS-PAGE of recombinant human MPEG1 showing a single species that migrates at an apparent molecular weight of ~75 kDa. **b)** Examples of the activity curves of a typical RBC lysis assay in the presence of various concentrations of MPEG1 at different pH. The assays were done in duplicates (n=2). Each data point is shown as an average with its associated standard deviation. Error is plotted for all data points.

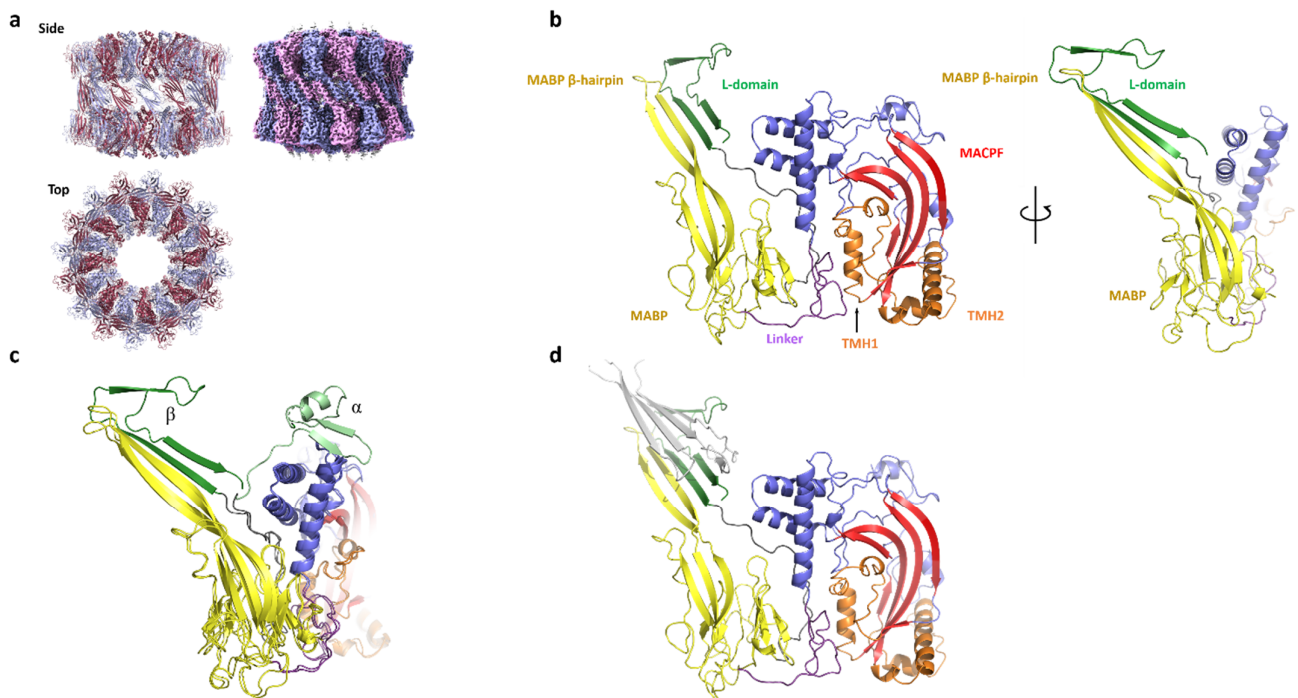

**Supplementary Figure 9. Subpopulation of MPEG1<sub>L425K</sub> observed by cryo-EM adopts an alternative  $\beta$ -conformation.** **a)** Structure (left) and cryo-EM reconstruction (right) of the MPEG1<sub>L425K</sub>  $\beta$ -conformation assembly shown in alternating colours (EMDB 20623, PDB 6U2L). **b)** The L-domain adopts a unique conformation resulting in a four stranded  $\beta$ -sheet extending from the original  $\beta$ -hairpin of the MABP domain. **c)** Structural superposition of the  $\alpha$ - and  $\beta$ -conformations. Rearrangement of the L-domain from the  $\alpha$ - to the  $\beta$ -conformation causes inter-subunit interactions with adjacent subunits to break, the  $\beta$ -conformation results in new **d)** in trans interactions between opposing 16-mer rings of the soluble head-to-head assembly (shown here partially in grey).



**a**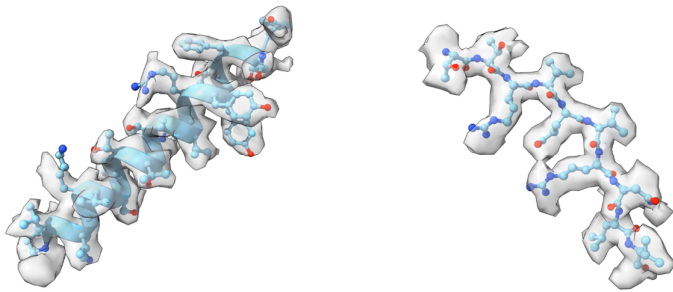**b**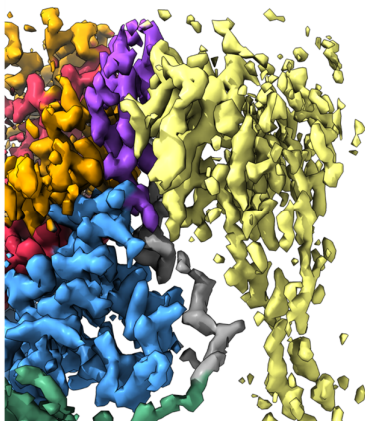**c**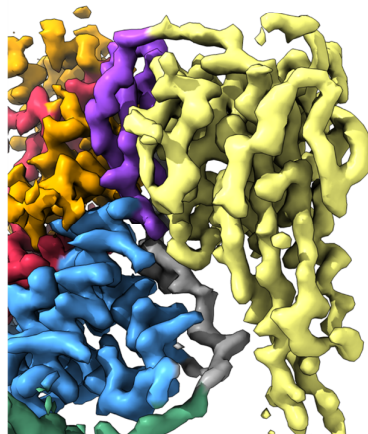**d**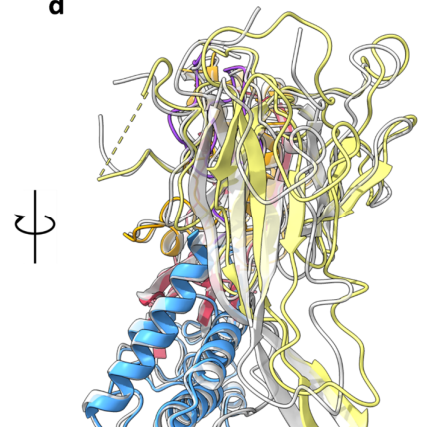

**Supplementary Figure 10. Conformational flexibility in the MABP domain.** **a)** Select regions of electron density at the central core region of the MACPF domain from the C16 reconstruction of MPEG1<sub>L425K</sub> (EMDB 20620) showing high resolution features. **b)** The same reconstruction has poor, anisotropic resolution in the peripheral MABP domain, however after localised reconstruction **c)** the intramolecular heterogeneity can be resolved (EMDB 20621). **d)** Structural superposition of two discrete conformations of the MABP domain.

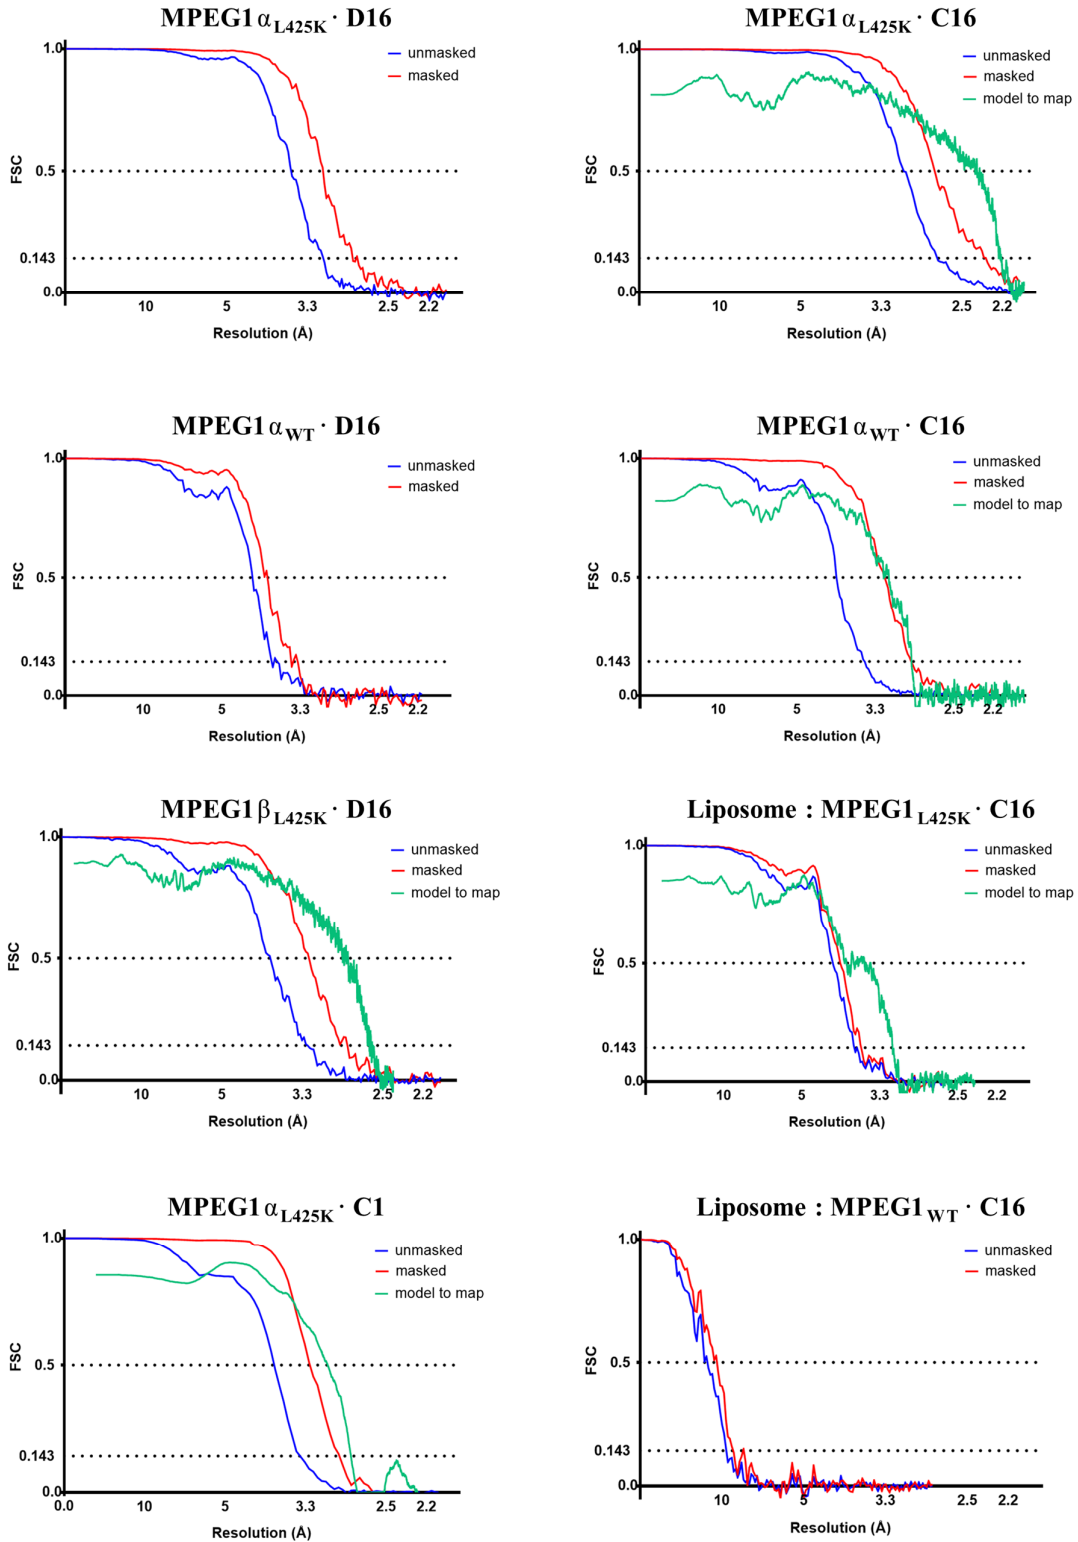

**Supplementary Figure 11. Gold-standard Fourier shell correlation (FSC) global resolution estimate.** Two FSC criteria are indicated at 0.5 and 0.143 thresholds by dotted lines. The FSC of masked half-maps (red), unmasked half-maps (blue) and model to half-map (green) are plotted (only for maps where atomic models were generated).



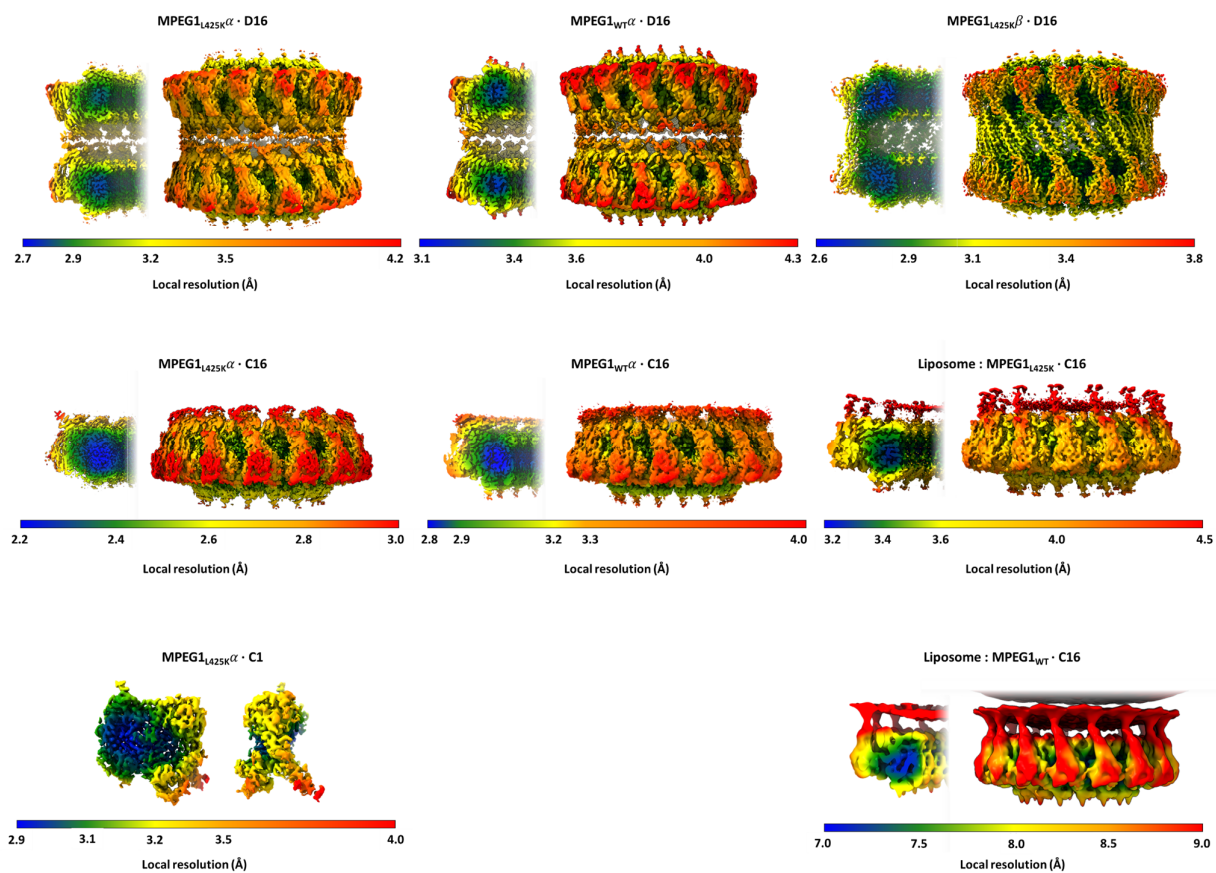

**Supplementary Figure 12. Local variation in resolution by gold-standard Fourier shell correlation (FSC) at 0.143.** Local resolution ranges in Ångström (Å) are displayed as a colour gradient (blue to red) on the locally filtered, sharpened maps. Colour scales are provided below each reconstruction.

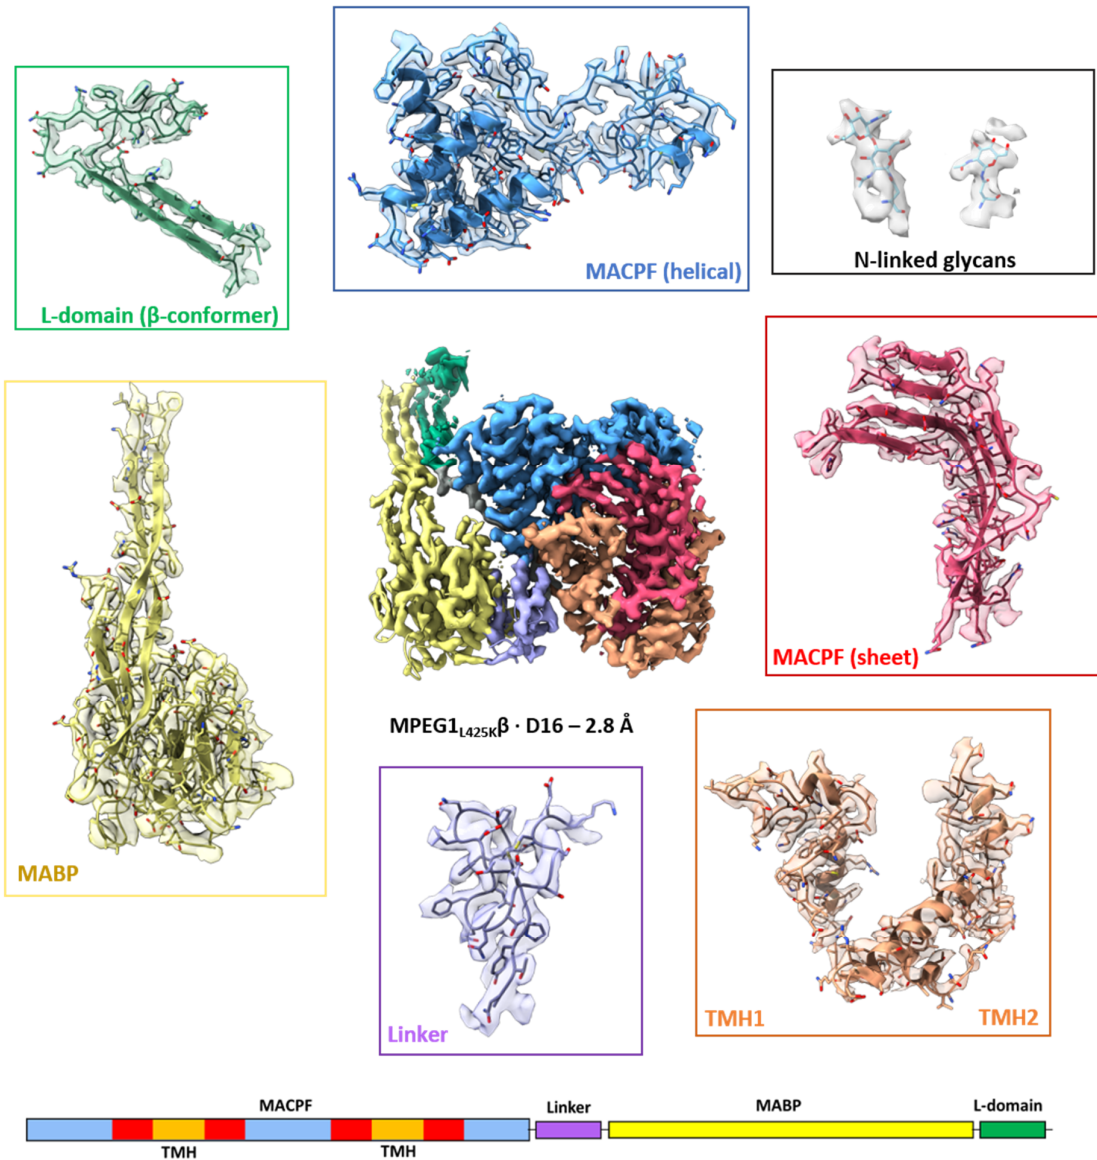

**Supplementary Figure 13: Qualitative comparison between atomic models and cryo-EM reconstruction of the D16 MPEG1<sub>L425K</sub>  $\beta$  reconstruction.** A single monomer of MPEG1 is shown (centre) and corresponding domain schematic (below). Extracted regions of electron density corresponding to each domain are boxed and labelled, electron density is shown as a transparent surface and atomic model cartoon and side chains displayed beneath. All boxes, labels and surfaces are coloured consistently with Fig. 1. and the domain schematic.

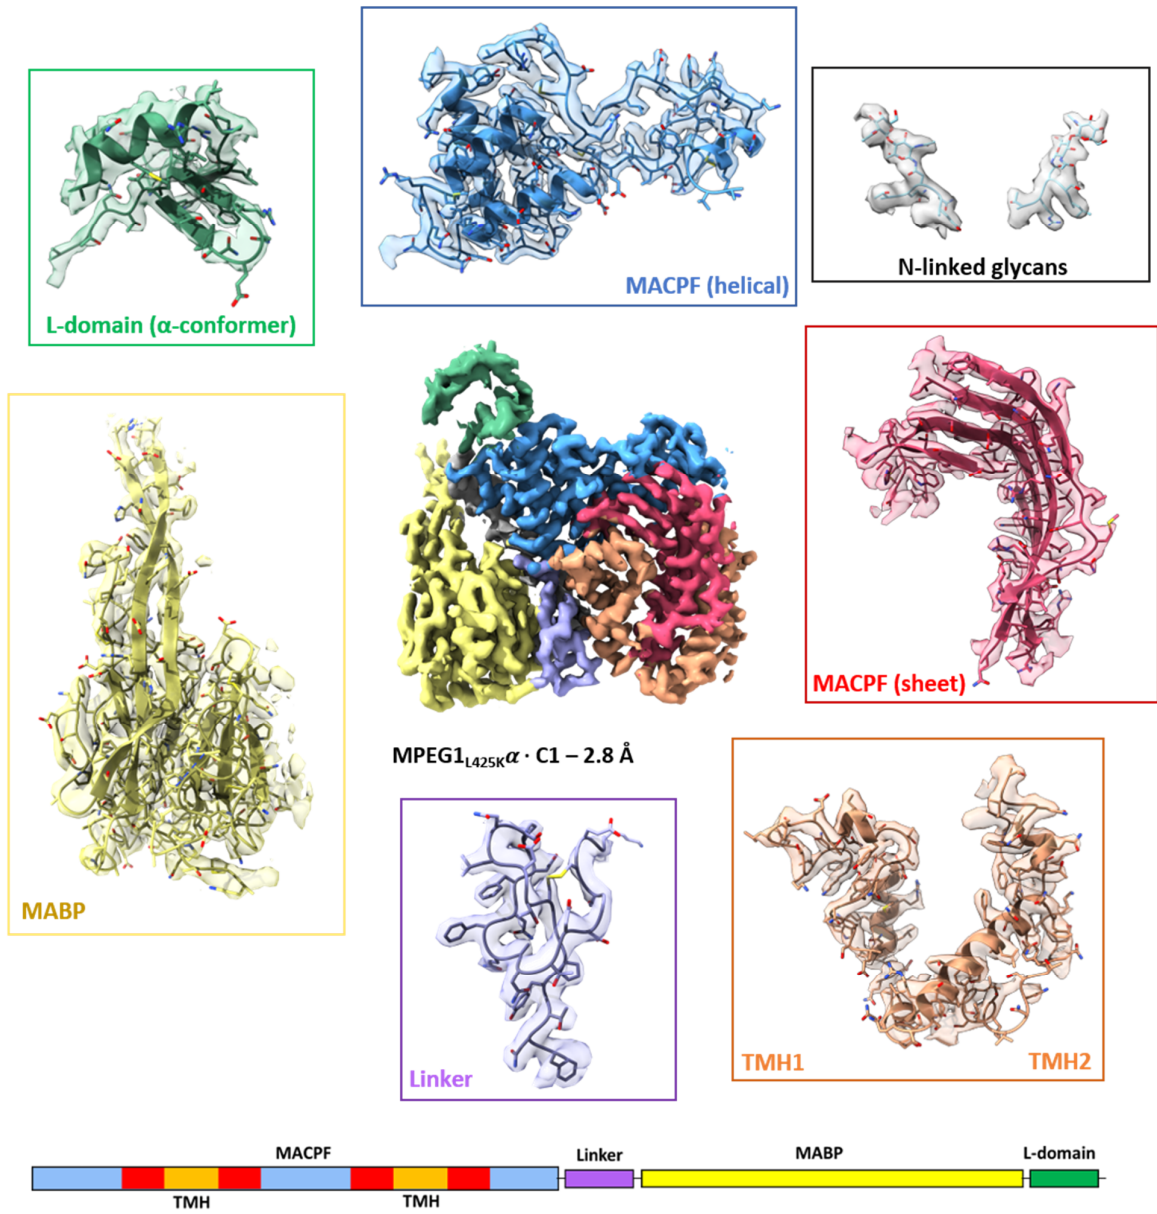

**Supplementary Figure 14. Qualitative comparison between atomic models and cryo-EM reconstruction of the C1 MPEG1<sub>L425K</sub>  $\alpha$  reconstruction.** Colouring of content as shown in Supp. Fig. 13.

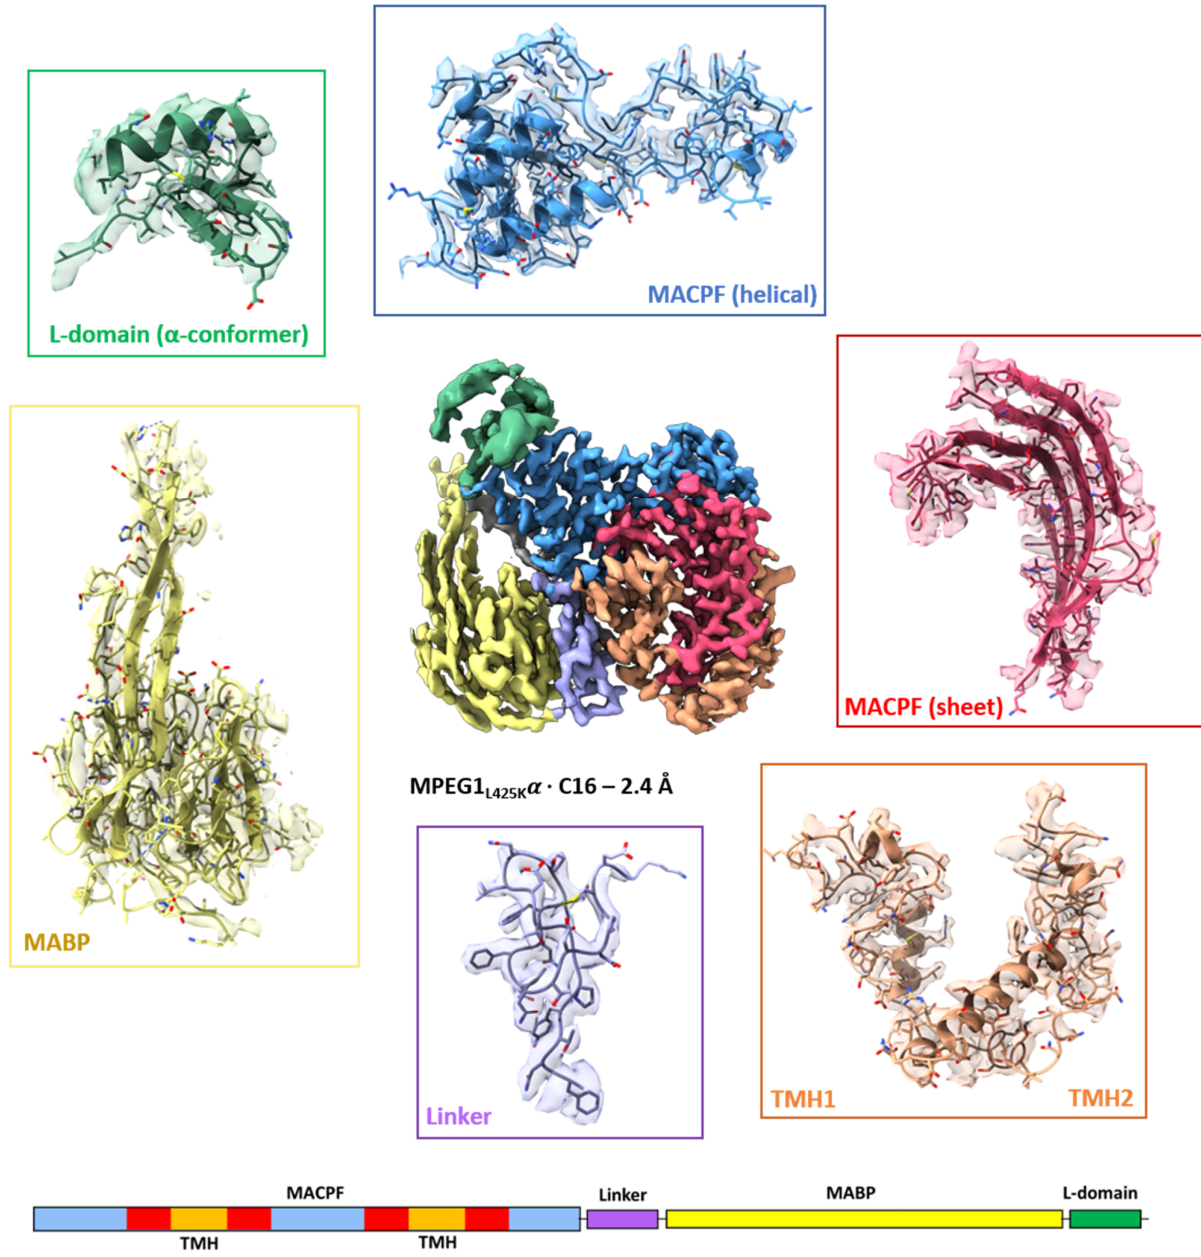

**Supplementary Figure 15. Qualitative comparison between atomic models and cryo-EM reconstruction of the C16 MPEG1<sub>L425K</sub>  $\alpha$  reconstruction.** Colouring of content as shown in Supp. Fig. 13.



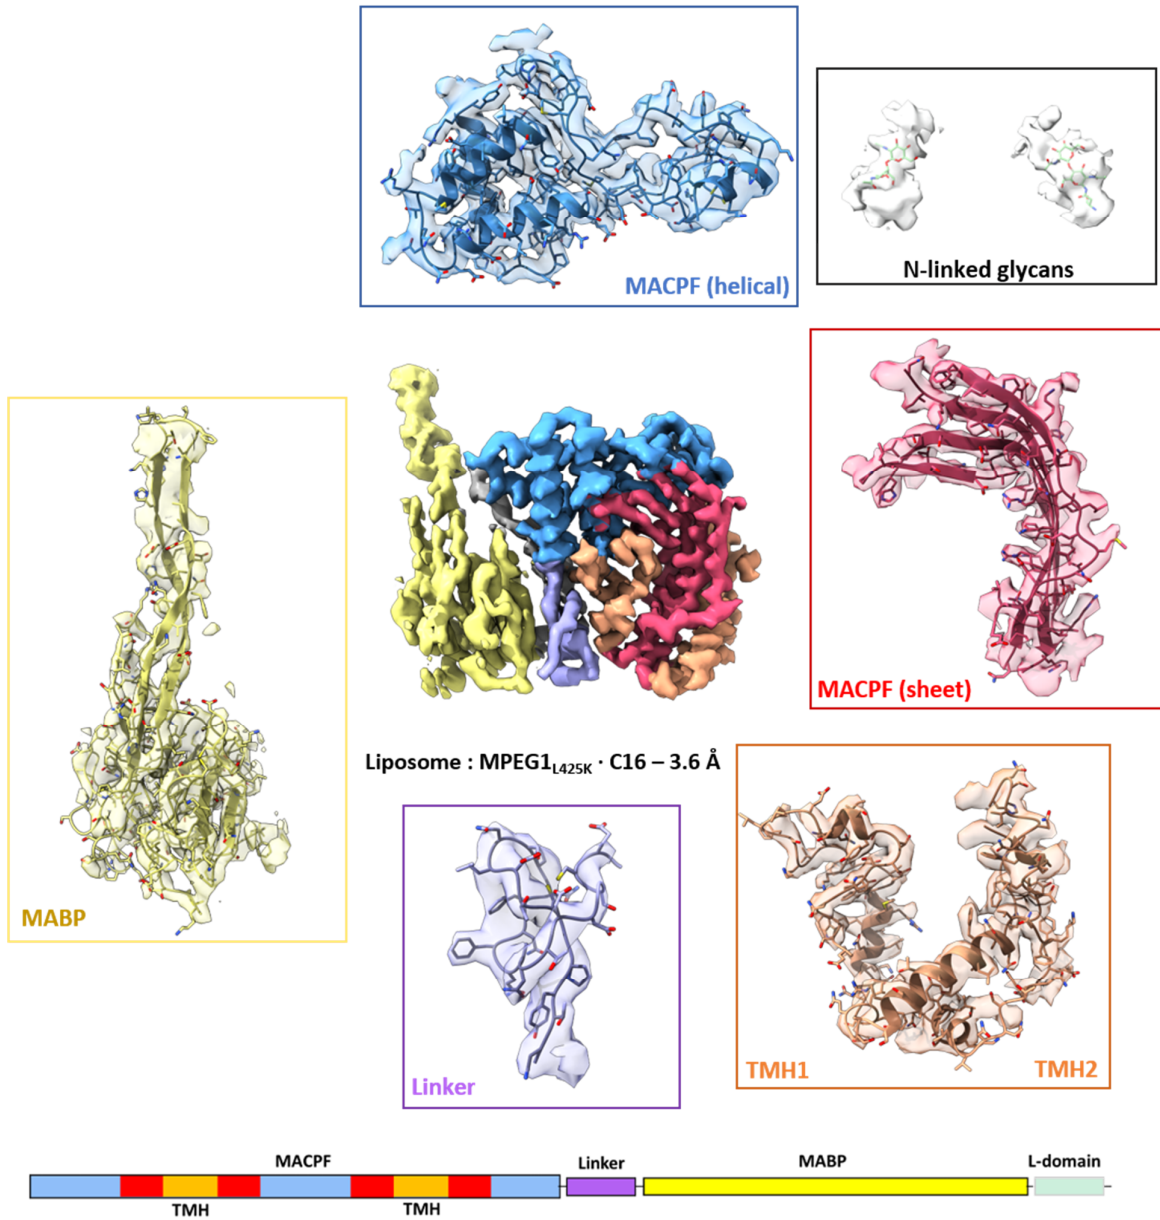

**Supplementary Figure 16. Qualitative comparison between atomic models and cryo-EM reconstruction of the C16 MPEG1<sub>L425K</sub> liposome bound reconstruction.** Colouring and content as shown in Supp. Fig. 13. The L-domain becomes flexible or disordered upon MPEG1 membrane binding and, hence, it is unresolved. It is intentionally not shown and this region in the domain schematic is transparent to reflect its absence.

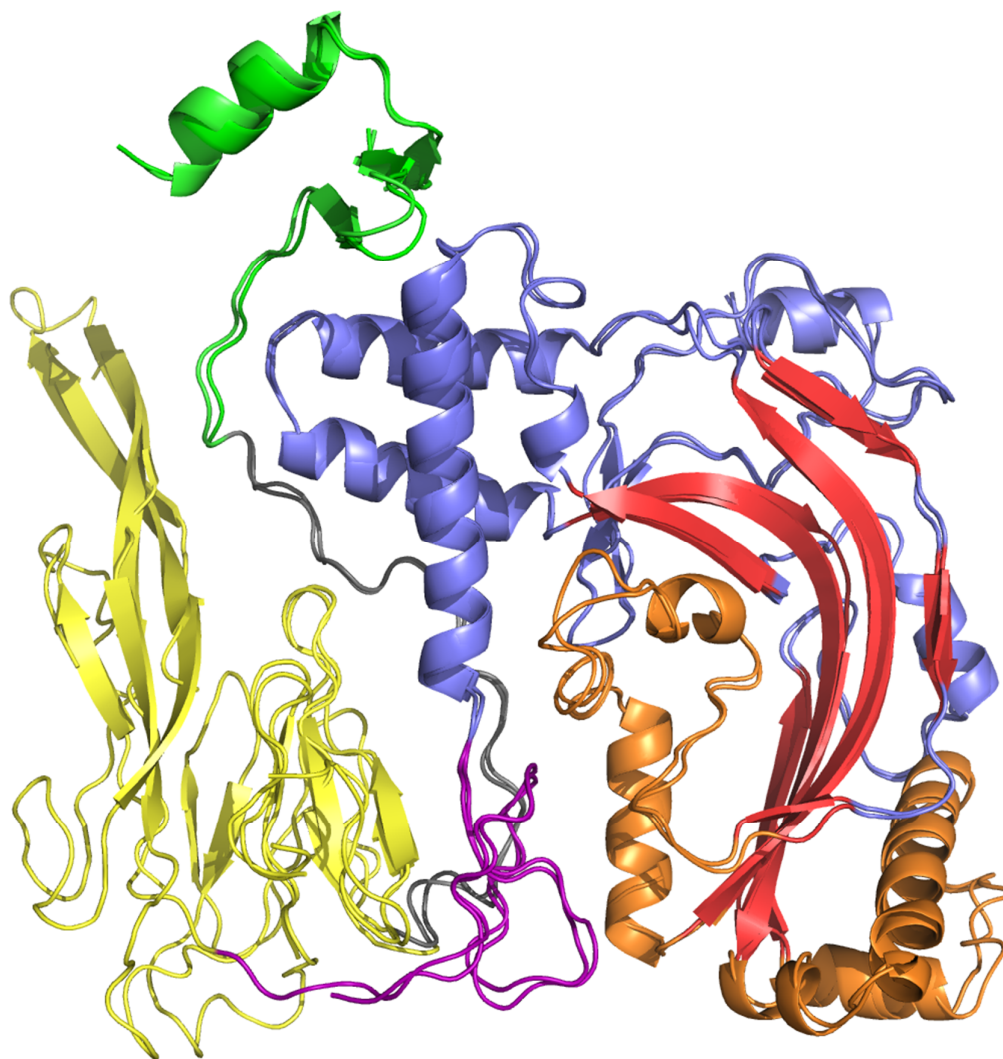

**Supplementary Figure 17. Structural superposition of wild type (PDB 6U23) and L425K (PDB 6U2J) MPEG1 monomers isolated from D16 head-to-head assemblies ( $\alpha$ -conformation).**

**Supplementary Table 1. Contacts ( $\leq 4$  Å) between adjacent MPEG1 monomers (1 and 2) in soluble assembly (PDB6U23).** The interface contacts were generated using CCP4 (CONTACT)<sup>3</sup> and PISA<sup>4</sup>. The contacts found around the central lumen of the  $\beta$ -barrel are shaded in red, and the in trans subunit interactions between the L-domain and the adjacent MABP  $\beta$ -hairpin are shaded in green.

| Monomer 1 |     | Monomer 2 |     | H/S* | Distance, Å |
|-----------|-----|-----------|-----|------|-------------|
| Leu21     | C   | Gln15     | E1  |      | 3.76        |
| Thr55     | OG1 | Lys18     | NZ  | H    | 3.69        |
| Glu57     | O   | Val25     | CB  |      | 3.93        |
|           |     | Val25     | O   |      | 3.42        |
| Glu57     | CG  | Glu27     | CA  |      | 3.90        |
|           |     | Glu27     | CB  |      | 3.72        |
| Asp58     | CG  | Glu27     | OE1 |      | 3.92        |
| Asp58     | OD1 | Glu27     | CD  |      | 3.81        |
|           |     | Glu27     | OE1 |      | 2.91        |
| Gly59     | CA  | Lys18     | NZ  |      | 3.56        |
| Phe68     | CZ  | Gly43     | N   |      | 3.66        |
| Ile70     | CG2 | Asp41     | OD2 |      | 3.67        |
| Ile70     | CD1 | Asp41     | O   |      | 3.72        |
|           |     | Asp41     | CG  |      | 3.79        |
|           |     | Asp41     | OD1 |      | 3.19        |
|           |     | Asp41     | OD2 |      | 3.98        |
| Pro71     | O   | Val284    | CG1 |      | 3.76        |
| Pro71     | CB  | Glu27     | OE1 |      | 3.63        |
| Pro71     | CG  | Glu27     | O   |      | 3.90        |
|           |     | Glu27     | OE1 |      | 3.76        |
| Gln72     | O   | Val284    | CG1 |      | 3.61        |
|           |     | Ile261    | O   |      | 3.14        |
| Lys73     | C   | Ile261    | O   |      | 3.42        |
| Lys73     | O   | Ile261    | C   |      | 3.53        |
|           |     | Ile261    | O   |      | 2.96        |
| Lys73     | CB  | Val284    | CG1 |      | 3.92        |
|           |     | Ile261    | O   |      | 3.66        |
| Lys73     | CG  | Val284    | CG1 |      | 3.83        |
| Lys73     | NZ  | His282    | ND1 |      | 3.41        |
|           |     | Glu27     | OE1 | S    | 3.98        |
|           |     | Glu27     | OE2 | S    | 3.79        |
| Gln74     | CA  | Ser260    | O   |      | 3.42        |
| Gln74     | C   | Ser260    | O   |      | 3.71        |
| Gln74     | CG  | Ser260    | O   |      | 3.90        |
| Gln74     | NE2 | Gln259    | OE1 | H    | 3.07        |
| Ser75     | N   | Ser260    | O   | H    | 3.10        |
| Ser75     | O   | Val258    | O   |      | 3.58        |
|           |     | Ser260    | N   | H    | 3.32        |
|           |     | Gln259    | CA  |      | 3.28        |

|        |     |        |     |   |      |
|--------|-----|--------|-----|---|------|
|        |     | Gln259 | C   |   | 3.82 |
|        |     | Gln259 | CB  |   | 3.76 |
| Ser75  | CB  | Ser260 | OG  |   | 3.52 |
| Ser75  | OG  | Phe266 | N   |   | 3.98 |
| Asn76  | C   | Val258 | O   |   | 3.83 |
| Asn76  | OD1 | Gln259 | CB  |   | 3.43 |
|        |     | Gln259 | CD  |   | 3.91 |
|        |     | Gln259 | OE1 |   | 3.06 |
| Leu77  | N   | Val258 | O   | H | 3.23 |
| Leu77  | CA  | Val258 | O   |   | 3.78 |
| Leu77  | O   | Arg257 | CB  |   | 3.53 |
|        |     | Val258 | O   |   | 3.75 |
|        |     | Arg257 | CA  |   | 3.28 |
|        |     | Arg257 | C   |   | 3.64 |
|        |     | Val258 | N   | H | 3.01 |
| Leu77  | CB  | Val258 | O   |   | 3.39 |
| Leu77  | CD2 | Pro268 | CD  |   | 3.97 |
|        |     | Phe266 | CD2 |   | 3.85 |
|        |     | Phe266 | CE2 |   | 3.92 |
|        |     | Pro268 | CG  |   | 3.93 |
| Glu78  | CA  | Ser256 | O   |   | 3.91 |
| Glu78  | C   | Ser256 | O   |   | 3.95 |
| Glu78  | CD  | Asn255 | ND2 |   | 3.55 |
|        |     | Ser256 | O   |   | 3.57 |
| Glu78  | OE1 | Arg257 | CB  |   | 3.30 |
|        |     | Ser256 | O   |   | 3.95 |
|        |     | Arg257 | CG  |   | 3.97 |
| Glu78  | OE2 | Asn255 | ND2 | H | 2.30 |
|        |     | Ser256 | O   |   | 3.24 |
|        |     | Ser256 | C   |   | 4.00 |
|        |     | Asn255 | CG  |   | 3.27 |
|        |     | Asn255 | OD1 |   | 3.56 |
| Met79  | N   | Ser256 | O   | H | 3.05 |
| Met79  | CA  | Ser256 | O   |   | 3.85 |
| Met79  | CB  | Ser256 | O   |   | 3.68 |
| Met79  | SD  | Ser256 | O   |   | 3.86 |
| Met79  | CE  | Val258 | CG2 |   | 3.89 |
| Asn80  | CB  | Asn255 | ND2 |   | 3.50 |
| Asn80  | CG  | Asn255 | ND2 |   | 3.88 |
| Asn80  | OD1 | Asn255 | ND2 | H | 3.50 |
|        |     | Asn255 | N   |   | 3.99 |
|        |     | Asn255 | CA  |   | 3.31 |
|        |     | Asn255 | C   |   | 3.54 |
|        |     | Ser256 | N   | H | 3.32 |
| Thr100 | O   | Pro573 | CG  |   | 3.83 |
| Leu102 | CD1 | Arg575 | NE  |   | 4.00 |



|        |     |        |     |   |      |
|--------|-----|--------|-----|---|------|
| Ser103 | C   | Ser468 | O   |   | 3.67 |
| Ser103 | O   | Lys469 | CA  |   | 3.86 |
|        |     | Lys469 | C   |   | 3.97 |
| Leu104 | N   | Ser468 | O   |   | 3.28 |
| Leu104 | CA  | Ser468 | O   |   | 3.52 |
|        |     | Gln478 | NE2 |   | 3.49 |
| Leu104 | C   | Gln478 | NE2 |   | 3.35 |
| Leu104 | O   | Gln478 | CD  |   | 3.16 |
|        |     | Gln478 | OE1 |   | 3.37 |
|        |     | Gln478 | NE2 | H | 2.52 |
| Leu104 | CB  | Ser468 | O   |   | 3.57 |
| Leu104 | CG  | Gln478 | OE1 |   | 3.49 |
|        |     | Gln478 | NE2 |   | 3.74 |
| Leu104 | CD1 | Ser468 | CA  |   | 3.90 |
|        |     | Ser468 | OG  |   | 3.69 |
| Leu104 | CD2 | Gln478 | CD  |   | 3.99 |
|        |     | Gln478 | OE1 |   | 3.15 |
| Lys107 | CD  | Asn476 | OD1 |   | 3.82 |
| Lys143 | NZ  | Asp41  | O   | H | 3.67 |
|        |     | Met42  | CB  |   | 3.55 |
| Pro146 | CB  | Glu157 | OE2 |   | 3.87 |
|        |     | Asn183 | CG  |   | 3.91 |
|        |     | Asn183 | ND2 |   | 3.83 |
| Pro146 | CG  | Asn183 | CB  |   | 3.79 |
|        |     | Asn183 | CG  |   | 3.83 |
| Ser217 | OG  | Arg253 | C   |   | 3.92 |
|        |     | Arg253 | O   | H | 2.83 |
|        |     | Thr254 | CA  |   | 3.77 |
| Leu225 | CD1 | Phe235 | CZ  |   | 3.68 |
| Gln228 | OE1 | Phe235 | CD1 |   | 3.39 |
|        |     | Phe235 | CE1 |   | 3.15 |
|        |     | Phe235 | CZ  |   | 3.62 |
| Asn229 | OD1 | Phe235 | CE2 |   | 3.91 |
| Phe233 | CE1 | Glu236 | OE2 |   | 3.98 |
| Phe233 | CZ  | Glu236 | OE2 |   | 3.80 |
| Leu272 | CD2 | Pro268 | CD  |   | 3.84 |
| Gln273 | CB  | Tyr267 | CD2 |   | 3.96 |
|        |     | Tyr267 | CE2 |   | 3.78 |
|        |     | Tyr267 | CZ  |   | 3.95 |
| Gln273 | CG  | Tyr267 | CE2 |   | 3.96 |
|        |     | Tyr267 | CZ  |   | 3.70 |
|        |     | Tyr267 | OH  |   | 3.77 |
| Gln273 | CD  | Tyr267 | CZ  |   | 3.92 |
|        |     | Tyr267 | OH  |   | 3.60 |
| Gln273 | NE2 | Tyr267 | OH  |   | 3.65 |
| Gln276 | CD  | Pro265 | CB  |   | 3.92 |

|        |     |        |     |   |      |
|--------|-----|--------|-----|---|------|
|        |     | Phe266 | O   |   | 3.55 |
| Gln276 | OE1 | Tyr267 | CD1 |   | 3.81 |
|        |     | Tyr267 | CB  |   | 3.70 |
|        |     | Pro265 | C   |   | 3.96 |
|        |     | Pro265 | O   |   | 3.87 |
|        |     | Pro265 | CB  |   | 3.73 |
|        |     | Phe266 | C   |   | 3.69 |
|        |     | Phe266 | O   |   | 3.16 |
| Gln276 | NE2 | Phe266 | O   | H | 3.14 |
| Pro308 | CB  | Phe436 | CG  |   | 3.98 |
|        |     | Phe436 | CD2 |   | 3.64 |
|        |     | Phe436 | CE2 |   | 3.62 |
|        |     | Phe436 | CZ  |   | 3.94 |
| Lys311 | NZ  | Pro583 | C   |   | 3.97 |
|        |     | Pro583 | O   | H | 2.87 |
|        |     | Leu584 | CA  |   | 3.89 |
|        |     | Leu584 | C   |   | 3.97 |
| Thr347 | CG2 | Ala477 | CB  |   | 3.83 |
| Asp348 | N   | Ala477 | CB  |   | 3.98 |
| Asp348 | O   | Ala477 | CB  |   | 3.45 |
| Asp348 | CB  | Thr475 | O   |   | 3.37 |
| Asp348 | CG  | Thr475 | O   |   | 3.56 |
| Asp348 | OD2 | Thr475 | O   |   | 3.07 |
| Asp349 | O   | Cys480 | O   |   | 3.92 |
| Gly350 | O   | Ala482 | CB  |   | 3.96 |
| Glu353 | CD  | Arg506 | NH2 |   | 3.98 |
| Glu353 | OE1 | Arg506 | NE  | S | 3.95 |
|        |     | Arg506 | CZ  |   | 3.93 |
|        |     | Arg506 | NH2 | S | 3.83 |
| Glu353 | OE2 | Arg506 | NE  | S | 3.60 |
|        |     | Arg506 | CZ  |   | 3.78 |
|        |     | Arg506 | NH2 | S | 3.30 |
| Asn591 | N   | Thr430 | O   | H | 3.34 |
| Asn591 | CA  | Thr430 | O   |   | 3.77 |
| Asn591 | C   | Cys432 | N   |   | 3.95 |
| Asn591 | O   | Thr430 | O   |   | 3.55 |
|        |     | Val431 | CA  |   | 3.40 |
|        |     | Val431 | C   |   | 3.42 |
|        |     | Cys432 | N   | H | 2.74 |
|        |     | Cys432 | CA  |   | 3.58 |
|        |     | Cys432 | CB  |   | 3.49 |
|        |     | Cys432 | SG  |   | 3.95 |
|        |     | Cys432 | O   |   | 3.98 |
| Asn591 | CB  | Thr430 | O   |   | 3.33 |
| Thr592 | CA  | Cys432 | O   |   | 3.67 |
| Thr592 | CG2 | Leu416 | CD1 |   | 4.00 |

|        |     |        |     |   |      |
|--------|-----|--------|-----|---|------|
| Val593 | N   | Cys432 | O   | H | 3.46 |
| Ile594 | O   | Asp434 | OD1 |   | 3.29 |
|        |     | Glu433 | CB  |   | 3.62 |
|        |     | Glu433 | CA  |   | 3.60 |
|        |     | Asp434 | N   | H | 3.80 |
| Ile594 | CG2 | Glu433 | CB  |   | 3.64 |
| Val595 | CA  | Asp434 | OD1 |   | 3.44 |
| Val595 | CB  | Asp434 | OD1 |   | 3.72 |
| Val595 | CG1 | Asp434 | OD1 |   | 3.92 |
| Val595 | CG2 | Asp434 | CG  |   | 3.97 |
|        |     | Asp434 | OD1 |   | 3.28 |
|        |     | Asp434 | OD2 |   | 3.85 |
| Thr596 | N   | Asp434 | O   | H | 3.23 |
| Thr596 | C   | Asp434 | O   |   | 3.93 |
| Thr596 | O   | Phe436 | CD2 |   | 3.24 |
|        |     | Phe436 | CE2 |   | 3.95 |
|        |     | Asp434 | C   |   | 3.95 |
|        |     | Asp434 | O   |   | 3.09 |
|        |     | Val435 | CA  |   | 3.34 |
|        |     | Val435 | C   |   | 3.76 |
|        |     | Phe436 | N   | H | 3.35 |
| Thr596 | CG2 | Asp434 | O   |   | 3.79 |
|        |     | Val435 | CG2 |   | 3.99 |
| Asn597 | CA  | Phe436 | N   |   | 3.95 |
|        |     | Phe436 | O   |   | 3.76 |
| Asn597 | C   | Phe436 | O   |   | 3.95 |
| Asn597 | CB  | Phe436 | CB  |   | 3.87 |
|        |     | Phe436 | O   |   | 3.82 |
| Ser598 | N   | Phe436 | O   | H | 3.17 |
| Ser598 | CB  | Gln437 | NE2 |   | 3.46 |
|        |     | Phe436 | O   |   | 3.92 |
|        |     | Gln437 | CD  |   | 3.91 |
|        |     | Gln437 | OE1 |   | 3.88 |
| Ser598 | OG  | Gln437 | NE2 |   | 3.84 |
|        |     | Gln437 | OE1 |   | 3.99 |
| Glu599 | C   | Ser586 | O   |   | 3.84 |
| Glu599 | O   | Ser586 | C   |   | 3.94 |
|        |     | Ser586 | O   |   | 2.99 |
| Glu599 | CB  | Ser586 | O   |   | 3.77 |
| Glu599 | CD  | Vak438 | CG1 |   | 3.65 |
| Glu599 | OE1 | Vak438 | CB  |   | 3.58 |
|        |     | Vak438 | CG1 |   | 3.32 |
|        |     | Ser586 | CB  |   | 3.62 |
| Glu599 | OE2 | Val438 | N   | H | 3.39 |
|        |     | Val438 | CB  |   | 3.78 |
|        |     | Val438 | CG1 |   | 3.21 |

|        |     |        |     |   |      |
|--------|-----|--------|-----|---|------|
| Asn600 | CB  | Gln587 | O   |   | 3.92 |
| Asn600 | CG  | Met585 | O   |   | 3.85 |
| Asn600 | ND2 | Met585 | O   | H | 3.46 |
| Ile628 | CA  | His419 | ND1 |   | 3.51 |
| Ile628 | C   | His419 | ND1 |   | 3.18 |
|        |     | His419 | CE1 |   | 3.56 |
|        |     | His419 | CG  |   | 3.72 |
| Ile628 | O   | His419 | CB  |   | 3.35 |
|        |     | His419 | ND1 |   | 3.06 |
|        |     | His419 | CE1 |   | 3.69 |
|        |     | His419 | CG  |   | 3.13 |
|        |     | His419 | CD2 |   | 3.77 |
| Ile628 | CB  | His419 | ND1 |   | 3.28 |
|        |     | His419 | CE1 |   | 3.52 |
| His629 | N   | His419 | ND1 |   | 3.84 |
|        |     | His419 | CE1 |   | 3.76 |
| His629 | CB  | His419 | NE2 |   | 3.88 |

---

\* H- hydrogen bond, S- salt bridges

**Supplementary Table 2. Oligonucleotide primers for site directed mutagenesis.**

| <b>Name</b>        | <b>Sequence</b>                             |
|--------------------|---------------------------------------------|
| HuMPEG L425K (fw)  | 5' - GGA AGT GTA CTT TGA AGG TGT TCT GC -3' |
| HuMPEG L425K (rev) | 5' - GTC TTG CAG AAC ACC TTC AAA GTA C -3'  |

**Supplementary Table 3. Cryo-electron microscopy data collection, refinement and validation statistics.**

|                                                                   | MPEG1<br>WT  |                      | MPEG1 $\alpha$<br>L425K |                      |                        | MPEG1 $\beta$<br>L425K | MPEG1<br>WT (liposome) | MPEG1<br>L425K (liposome) |
|-------------------------------------------------------------------|--------------|----------------------|-------------------------|----------------------|------------------------|------------------------|------------------------|---------------------------|
| <b>Data collection and processing</b>                             |              |                      |                         |                      |                        |                        |                        |                           |
| Magnification                                                     | 128k ×       |                      | 75k ×                   |                      |                        |                        | 105k ×                 | 105k ×                    |
| Anisotropy (Angle, Major, Minor)                                  | N/A          |                      | 67°, 1.013, 1.000       |                      |                        |                        | N/A                    | N/A                       |
| Voltage (kV)                                                      | 300          |                      | 300                     |                      |                        |                        | 300                    | 300                       |
| Electron exposure (e <sup>-</sup> Å <sup>-2</sup> )               | 45           |                      | 44.8                    |                      |                        |                        | 53.6                   | 53.6                      |
| Exposure rate (e <sup>-</sup> pix <sup>-1</sup> s <sup>-1</sup> ) | 54.5         |                      | 3.9                     |                      |                        |                        | 8                      | 8                         |
| Exposure duration (s)                                             | 1            |                      | 12.8                    |                      |                        |                        | 12                     | 12                        |
| Set defocus range (μm)                                            | -0.6 to -3.5 |                      | -0.7 to -2.5            |                      |                        |                        | -0.7 to -3.0           | -0.7 to -3.0              |
| Measured defocus (μ ± σ) (μm)                                     | 2.4 ± 1.0    |                      | 1.7 ± 0.6               |                      |                        |                        | 2.6 ± 1.2              | 1.8 ± 0.6                 |
| Camera                                                            | Falcon II    |                      | K2 Gatan Summit         |                      |                        |                        | K2 Gatan Summit        | K2 Gatan Summit           |
| Mode                                                              | Integration  |                      | Super Resolution        |                      |                        |                        | Counting               | Counting                  |
| Frames                                                            | 17           |                      | 32                      |                      |                        |                        | 30                     | 30                        |
| Pixel size (Å pix <sup>-1</sup> )                                 | 1.1          |                      | 0.53                    |                      |                        |                        | 1.4                    | 1.4                       |
| Micrographs                                                       | 1,119        |                      | 1,795                   |                      |                        |                        | 2,531                  | 6,228                     |
| Particles (Total)                                                 | 54,383       | 202,326 <sup>^</sup> | 133,631                 | 267,262 <sup>^</sup> | 4,276,192 <sup>^</sup> | 133,631                | 12,364                 | 38,479                    |
| Particles (Final)                                                 | 25,359       | 202,326 <sup>^</sup> | 12,578                  | 138,422 <sup>^</sup> | 527,402 <sup>^</sup>   | 6,265                  | 4,217                  | 12,311                    |
| Reconstruction Strategy                                           | Standard     | LocalRec             | Standard                | LocalRec             | LocalRec               | Standard               | Standard               | Standard                  |
| Binning factor                                                    | 1            | 1                    | 2                       | 2                    | 2                      | 2                      | 1                      | 1                         |
| Symmetry Imposed                                                  | D16          | C16                  | D16                     | C16                  | C1                     | D16                    | C16                    | C16                       |
| Global Resolution (Å)                                             |              |                      |                         |                      |                        |                        |                        |                           |
| 0.5 (Unmasked / Masked)                                           | 4.16 / 3.70  | 4.00 / 3.21          | 3.96 / 3.36             | 3.42 / 2.75          | 3.89 / 3.29            | 3.85 / 3.26            | 12.0 / 10.8            | 4.20 / 3.76               |
| 0.143 (Unmasked / Masked)                                         | 3.93 / 3.49  | 3.03 / 2.91          | 3.39 / 3.01             | 2.98 / 2.37          | 3.46 / 2.93            | 3.29 / 2.83            | 9.55 / 8.94            | 4.01 / 3.63               |
| Local resolution range (Å) <sup>#</sup>                           | > 4.4 to 3.1 | > 4.0 to 2.8         | > 4.2 to 2.7            | > 4.0 to 2.2         | > 3.9 to 2.9           | > 4.2 to 2.6           | > 12.0 to 7.0          | > 4.5 to 3.2              |
| Sphericity of 3DFSC                                               | 0.989        | 0.992                | 0.978                   | 0.987                | 0.958                  | 0.964                  | N/A                    | 0.991                     |
| Map sharpening <i>B</i> factor (Å <sup>2</sup> )                  | -133         | -72                  | -70                     | -78                  | -84                    | -57                    | -550                   | -145                      |
| EMDB identifier*                                                  | EMBD 20617   | EMBD 20616           | EMBD 20619              | EMBD 20620           | EMBD 20621             | EMBD 20623             | EMBD 20622             | EMBD 20627                |

<sup>#</sup>As determined by windowed FSC at 0.143 criterion in Relion (2.1)

\*Mask, half-maps, unsharpened map, locally-filtered sharpened map if applicable.

<sup>^</sup>Subparticles from localised reconstruction.

|                                    | MPEG1<br>WT |                | MPEG1 $\alpha$<br>L425K |                | MPEG1 $\beta$<br>L425K |                | MPEG1<br>WT (liposome) | MPEG1<br>L425K (liposome) |
|------------------------------------|-------------|----------------|-------------------------|----------------|------------------------|----------------|------------------------|---------------------------|
| <b>Refinement</b>                  |             |                |                         |                |                        |                |                        |                           |
| Initial model (PDB code)           | N/A         | <i>de novo</i> | N/A                     | <i>de novo</i> | <i>de novo</i>         | <i>de novo</i> | N/A                    | <i>de novo</i>            |
| Model-to-map resolution            |             |                |                         |                |                        |                |                        |                           |
| CC (volume)                        |             | 0.81           |                         | 0.81           | 0.83                   | 0.82           |                        | 0.79                      |
| (Å, FSC 0.143 / 0.5)               |             | 2.9/3.0        |                         | 2.2/2.4        | 2.8/3.1                | 2.6/2.8        |                        | 3.2/3.9                   |
| <i>B</i> factors (Å <sup>2</sup> ) |             |                |                         |                |                        |                |                        |                           |
| Protein                            |             | 47.26          |                         | 60.9           | 81.27                  | 56.78          |                        | 90.24                     |
| Ligand                             |             | 83.66          |                         | 75.76          | 107.99                 | 70.85          |                        | 1119.11                   |
| R.M.S. deviation                   |             |                |                         |                |                        |                |                        |                           |
| Bond length (Å)                    |             | 0.007          |                         | 0.007          | 0.01                   | 0.009          |                        | 0.005                     |
| Bond angles (°)                    |             | 0.931          |                         | 0.895          | 0.989                  | 1.031          |                        | 1.142                     |
| Ramachandran plot                  |             |                |                         |                |                        |                |                        |                           |
| Favoured (%)                       |             | 92.67          |                         | 95.19          | 90.3                   | 92.92          |                        | 88.06                     |
| Allowed (%)                        |             | 7.33           |                         | 4.81           | 9.7                    | 7.08           |                        | 11.94                     |
| Disallowed (%)                     |             | 0              |                         | 0.00           | 0                      | 0.00           |                        | 0                         |
| C $\beta$ deviations (%)           |             | 0              |                         | 0.00           | 0                      | 0.00           |                        | 0                         |
| Validation                         |             |                |                         |                |                        |                |                        |                           |
| EM-Ringer Score                    |             | 2.84           |                         | 4.12           | NA                     | 3.92           |                        | 1.59                      |
| MolProbity Score                   |             | 1.55           |                         | 1.53           | 1.67                   | 1.56           |                        | 1.76                      |
| Clash score                        |             | 3              |                         | 4.13           | 3.32                   | 3.15           |                        | 3.78                      |
| Poor rotamers (%)                  |             | 0.39           |                         | 0.41           | 0.19                   | 0.19           |                        | 0.84                      |
| PDB identifier                     |             | PDB 6U23       |                         | PDB 6U2J       | PDB 6U2K               | PDB 6U2L       |                        | PDB 6U2W                  |

### Supplementary References

1. Leung, C. *et al.* Real-time visualization of perforin nanopore assembly. *Nat. Nanotechnol.* **12**, 467–473 (2017).
2. Parsons, E. S. *et al.* Single-molecule kinetics of pore assembly by the membrane attack complex. *Nat. Commun.* **10**, (2019).
3. Winn, M. D. *et al.* Overview of the CCP4 suite and current developments. *Acta Crystallographica Section D: Biological Crystallography* **67**, 235–242 (2011).
4. Krissinel, E. & Henrick, K. Inference of Macromolecular Assemblies from Crystalline State. *J. Mol. Biol.* **372**, 774–797 (2007).
